# Supplementary material for: Epistatic pathways can drive HIV-1 escape from integrase strand transfer inhibitors
Source: PubMed Central journal article supplement — Sci Adv. 2024 Mar 1;10(9):eadn0042. doi: 10.1126/sciadv.adn0042 (PMC10906922; doi:10.1126/sciadv.adn0042), 2024-03-01
Supplement: sciadv.adn0042_sm.pdf [file sciadv.adn0042_sm.pdf]

Supplementary Materials for  
**Epistatic pathways can drive HIV-1 escape from integrase  
strand transfer inhibitors**

Yuta Hikichi *et al.*

Corresponding author: Eric O. Freed, [efreed@mail.nih.gov](mailto:efreed@mail.nih.gov)

*Sci. Adv.* **10**, eadn0042 (2024)  
DOI: 10.1126/sciadv.adn0042

**This PDF file includes:**

Figs. S1 to S7

Fig. S1

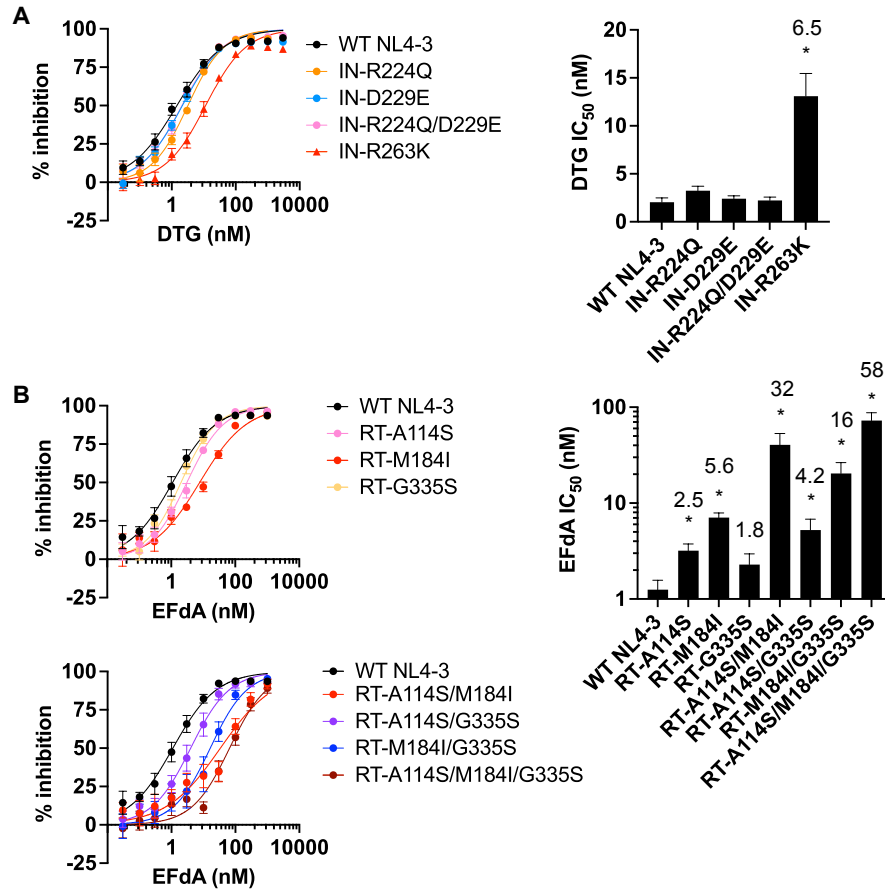

**Fig. S1. Sensitivity of selected mutants in the drug- target gene to DTG or EFdA.** TZM-bl cells were incubated with 100 TCID<sub>50</sub> of the indicated NL4-3-derived mutants in the presence of various concentrations of DTG and incubated for 48 h. (A) DTG sensitivity of the selected IN mutants shown in Fig. 1A. (B) EFdA sensitivity of the selected RT mutants shown in Fig. 1D. Data from at least three independent experiments are shown as means  $\pm$  SEMs.

Fig. S2

A. Gag

| Drugs           | Viruses          | Passage (weeks) | Conc. (nM) | Gag  |      |      |      |       |       |       |     |      |      |      |        |        |      |      |      |      |
|-----------------|------------------|-----------------|------------|------|------|------|------|-------|-------|-------|-----|------|------|------|--------|--------|------|------|------|------|
|                 |                  |                 |            | MA   |      |      |      | CA    |       |       | NC  |      |      |      |        |        |      |      |      |      |
|                 |                  |                 |            | E39K | L40M | R57K | Q62K | A116T | L136M | M214L | N8S | N17S | G19S | V25A | N27K/I | R29G/M | R32G | G35D | G40E | G43E |
| DTG (INSTI)     | WT NL4-3 cul 1   | 46              | 2,000      |      |      |      |      |       |       |       |     |      |      |      |        |        |      |      |      |      |
|                 | WT NL4-3 cul 2   | 39              | 1,000      |      |      |      |      |       |       |       |     |      |      |      |        |        |      |      |      |      |
|                 | WT NL4-3 cul 3   | 37              | 1,000      |      |      |      |      |       |       |       |     |      |      |      |        |        |      |      |      |      |
|                 | Env-A541V cul1   | 41              | 1,000      |      |      |      |      |       |       |       |     |      |      |      |        |        |      |      |      |      |
|                 | Env-A541V cul2   | 32              | 4,000      |      |      |      |      |       |       |       |     |      |      |      |        |        |      |      |      |      |
|                 | Env-A541V cul3   | 36              | 4,000      |      |      |      |      |       |       |       |     |      |      |      |        |        |      |      |      |      |
|                 | IN-G118R         | 39              | 2,000      |      |      |      |      |       |       |       |     |      |      |      |        |        |      |      |      |      |
|                 | WT NL(AD8) cul 1 | 31              | 1,000      |      |      |      |      |       |       |       |     |      |      |      |        |        |      |      |      |      |
|                 | WT NL(AD8) cul 2 | 35              | 500        |      |      |      |      |       |       |       |     |      |      |      |        |        |      |      |      |      |
|                 | WT NL(AD8) cul 3 | 31              | 500        |      |      |      |      |       |       |       |     |      |      |      |        |        |      |      |      |      |
| WT CH185 cul 1  | 36               | 6,400           |            |      |      |      |      |       |       |       |     |      |      |      |        |        |      |      |      |      |
| WT CH185 cul 1  | 36               | 500             |            |      |      |      |      |       |       |       |     |      |      |      |        |        |      |      |      |      |
| Env-T541I cul 1 | 36               | 20,000          |            |      |      |      |      |       |       |       |     |      |      |      |        |        |      |      |      |      |
| Env-T541I cul 2 | 36               | 20,000          |            |      |      |      |      |       |       |       |     |      |      |      |        |        |      |      |      |      |
| EFdA (NRTTI)    | WT NL4-3 cul 1   | 38              | 250        |      |      |      |      |       |       |       |     |      |      |      |        |        |      |      |      |      |
|                 | WT NL4-3 cul 2   | 17              | 16         |      |      |      |      |       |       |       |     |      |      |      |        |        |      |      |      |      |

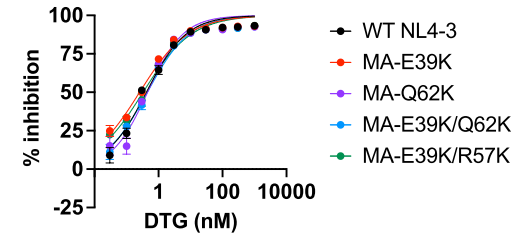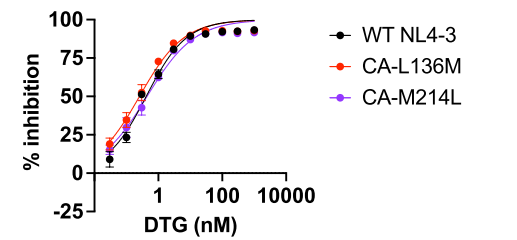

B. Pol

| Drugs           | Viruses          | Passage (weeks) | Conc. (nM) | Pol  |      |      |       |       |       |       |       |              |       |       |       |       |       |       |       |       |       |      |      |              |       |       |       |       |              |  |  |  |  |  |  |  |  |  |  |
|-----------------|------------------|-----------------|------------|------|------|------|-------|-------|-------|-------|-------|--------------|-------|-------|-------|-------|-------|-------|-------|-------|-------|------|------|--------------|-------|-------|-------|-------|--------------|--|--|--|--|--|--|--|--|--|--|
|                 |                  |                 |            | RT   |      |      |       |       |       |       |       |              |       |       |       |       | IN    |       |       |       |       |      |      |              |       |       |       |       |              |  |  |  |  |  |  |  |  |  |  |
|                 |                  |                 |            | V21I | K46R | V75I | A114S | T132I | A138T | T165A | R172K | <b>M184I</b> | V276I | V314I | G335S | E399K | V381L | I382L | T409I | V467I | D471I | A23T | V54L | <b>G118R</b> | A128T | V150I | R224Q | D229E | <b>R263K</b> |  |  |  |  |  |  |  |  |  |  |
| DTG (INSTI)     | WT NL4-3 cul 1   | 46              | 2,000      |      |      |      |       |       |       |       |       |              |       |       |       |       |       |       |       |       |       |      |      |              |       |       |       |       |              |  |  |  |  |  |  |  |  |  |  |
|                 | WT NL4-3 cul 2   | 39              | 1,000      |      |      |      |       |       |       |       |       |              |       |       |       |       |       |       |       |       |       |      |      |              |       |       |       |       |              |  |  |  |  |  |  |  |  |  |  |
|                 | WT NL4-3 cul 3   | 37              | 1,000      |      |      |      |       |       |       |       |       |              |       |       |       |       |       |       |       |       |       |      |      |              |       |       |       |       |              |  |  |  |  |  |  |  |  |  |  |
|                 | Env-A541V cul1   | 41              | 1,000      |      |      |      |       |       |       |       |       |              |       |       |       |       |       |       |       |       |       |      |      |              |       |       |       |       |              |  |  |  |  |  |  |  |  |  |  |
|                 | Env-A541V cul2   | 32              | 4,000      |      |      |      |       |       |       |       |       |              |       |       |       |       |       |       |       |       |       |      |      |              |       |       |       |       |              |  |  |  |  |  |  |  |  |  |  |
|                 | Env-A541V cul3   | 36              | 4,000      |      |      |      |       |       |       |       |       |              |       |       |       |       |       |       |       |       |       |      |      |              |       |       |       |       |              |  |  |  |  |  |  |  |  |  |  |
|                 | IN-G118R         | 39              | 2,000      |      |      |      |       |       |       |       |       |              |       |       |       |       |       |       |       |       |       |      |      |              |       |       |       |       |              |  |  |  |  |  |  |  |  |  |  |
|                 | WT NL(AD8) cul 1 | 31              | 1,000      |      |      |      |       |       |       |       |       |              |       |       |       |       |       |       |       |       |       |      |      |              |       |       |       |       |              |  |  |  |  |  |  |  |  |  |  |
|                 | WT NL(AD8) cul 2 | 35              | 500        |      |      |      |       |       |       |       |       |              |       |       |       |       |       |       |       |       |       |      |      |              |       |       |       |       |              |  |  |  |  |  |  |  |  |  |  |
|                 | WT NL(AD8) cul 3 | 31              | 500        |      |      |      |       |       |       |       |       |              |       |       |       |       |       |       |       |       |       |      |      |              |       |       |       |       |              |  |  |  |  |  |  |  |  |  |  |
| WT CH185 cul 1  | 36               | 6,400           |            |      |      |      |       |       |       |       |       |              |       |       |       |       |       |       |       |       |       |      |      |              |       |       |       |       |              |  |  |  |  |  |  |  |  |  |  |
| WT CH185 cul 2  | 36               | 500             |            |      |      |      |       |       |       |       |       |              |       |       |       |       |       |       |       |       |       |      |      |              |       |       |       |       |              |  |  |  |  |  |  |  |  |  |  |
| Env-T541I cul 1 | 36               | 20,000          |            |      |      |      |       |       |       |       |       |              |       |       |       |       |       |       |       |       |       |      |      |              |       |       |       |       |              |  |  |  |  |  |  |  |  |  |  |
| Env-T541I cul 2 | 36               | 20,000          |            |      |      |      |       |       |       |       |       |              |       |       |       |       |       |       |       |       |       |      |      |              |       |       |       |       |              |  |  |  |  |  |  |  |  |  |  |
| EFdA (NRTTI)    | WT NL4-3 cul 1   | 38              | 250        |      |      |      |       |       |       |       |       |              |       |       |       |       |       |       |       |       |       |      |      |              |       |       |       |       |              |  |  |  |  |  |  |  |  |  |  |
|                 | WT NL4-3 cul 2   | 17              | 16         |      |      |      |       |       |       |       |       |              |       |       |       |       |       |       |       |       |       |      |      |              |       |       |       |       |              |  |  |  |  |  |  |  |  |  |  |

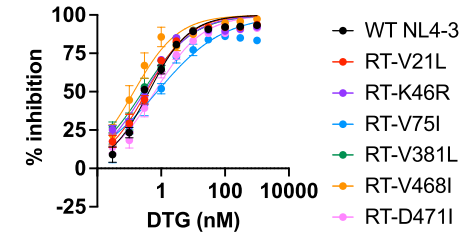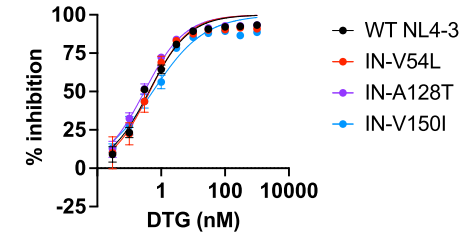



**Fig. S2. Summary of mutations in Gag, Pol, and Env-coding regions obtained with NL4-3, NL(AD8), and CH185 selections in the presence of DTG and EFdA.** The selected mutations in (A) Gag, (B) Pol, (C) gp120, and (D) gp41 in the presence of DTG or EFdA. Viruses used to initiate the selection are shown in the second column. The third column indicates the time of sampling. Repeated selection experiments are indicated as culture 1 (cul 1), cul 2, etc. Pol mutations highlighted in bold are established resistance mutations to DTG or EFdA. Dominant or mixed mutations at the indicated time points are highlighted in red or orange, respectively. TZM-bl cells were incubated with 100 TCID<sub>50</sub> of the indicated NL4-3-derived mutants in the presence of various concentrations of DTG and incubated for 48 h; luciferase activity was measured at 48 h postinfection. (E) Env structure of subtype B JR-FL SOSIP.664 (PDB accession number 5FYK) with the position of the Env mutations highlighted. Mutations in the gp120-gp41 interface are highlighted in pink. Several mutations in gp120 V1/V2 region disrupt N-linked glycosylation (highlighted in blue).

Fig. S3

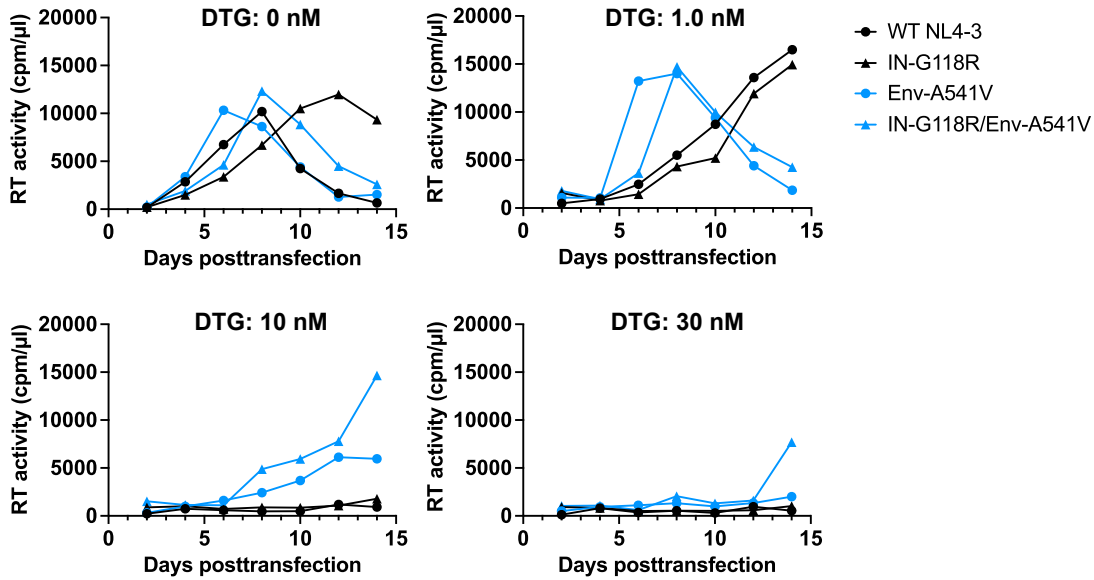

**Fig. S3. Replication kinetics of IN-G118R/Env-A541V in the presence of DTG.** The SupT1 T-cell line was transfected with WT NL4-3 or the indicated IN- or Env-mutant proviral clones in the absence or presence of serial dilutions of DTG (0.01 – 3,000 nM); data are shown for 0, 1.0, 10, and 30 nM DTG. Virus replication kinetics were monitored by measuring RT activity at the indicated time points. Data are representative of three independent experiments.

Fig. S4

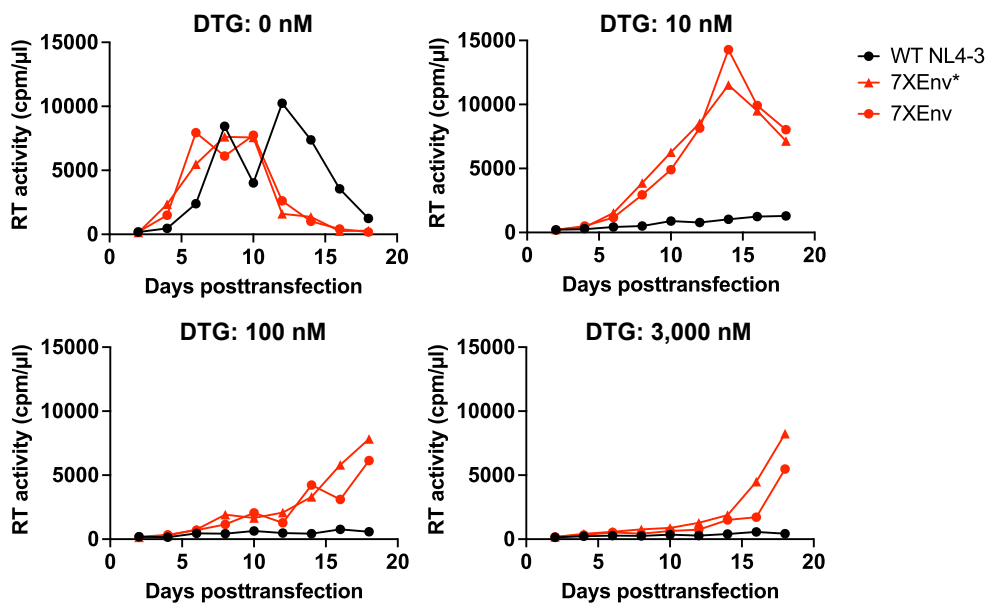

**Fig. S4. Replication kinetics of 7XEnv\* and 7XEnv in the presence of DTG.** The SupT1 T-cell line was transfected with WT NL4-3 or the indicated Env-mutant proviral clones in the absence or presence of serial dilutions of DTG (0.01 – 3,000 nM). Data for 0, 10, 100, and 3,000 nM DTG are shown. Virus replication kinetics were monitored by measuring RT activity at the indicated time points. 7XEnv does not contain the mutation in Vpu/Env-SP region (Vpu-V60L/SP-K6N). The comparison of WT vs 7XEnv and WT vs 7XEnv\* was performed at least three times with similar results.

Fig. S5

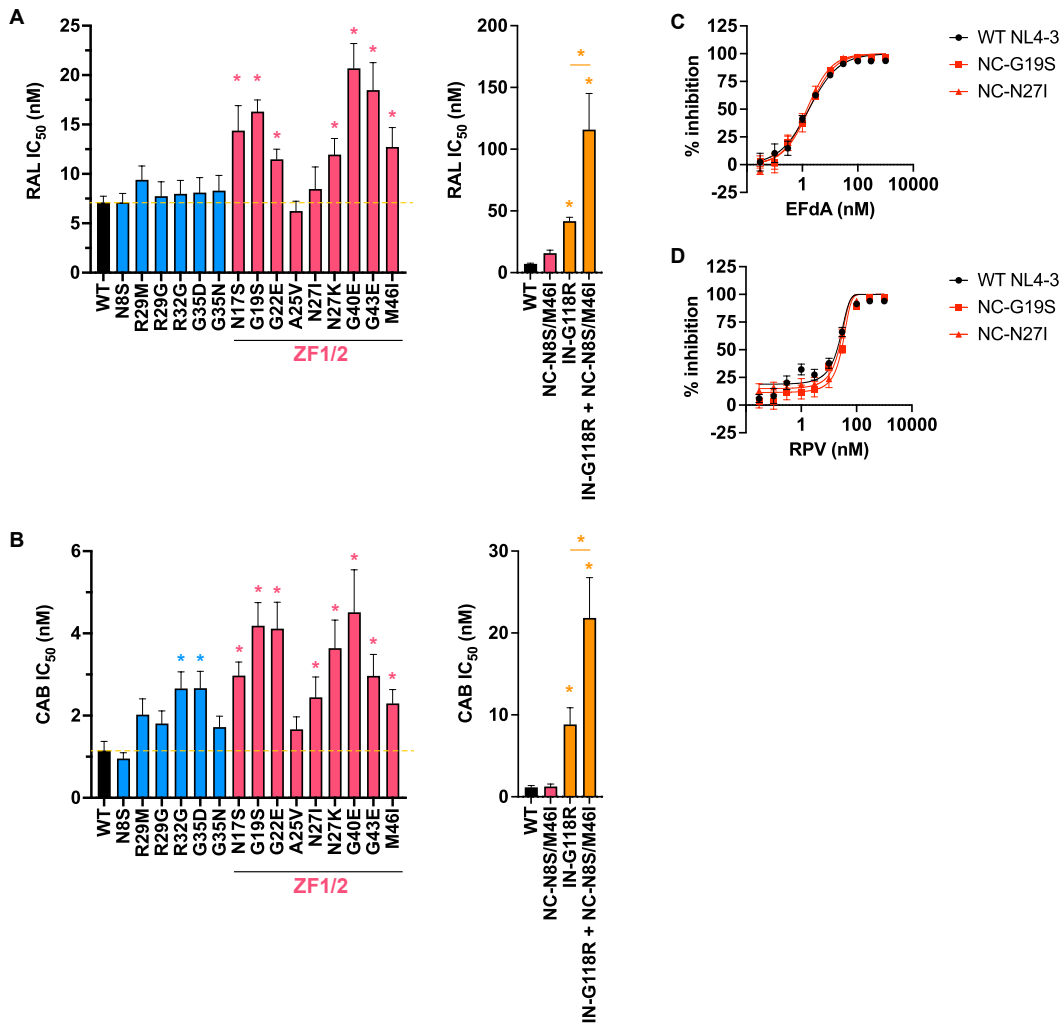

**Fig. S5. Sensitivity of the Gag-NC mutants to INSTIs and RT inhibitors.**

Sensitivity of the NC mutants to (A) RAL and (B) CAB. Mutations within or outside the zinc-finger domains (ZF1/2) are shown in blue and red, respectively. TZM-bl cells were exposed to 100 TCID<sub>50</sub> of WT or the NC mutants in the presence of various concentrations of DTG (from 0.03 to 1,000 nM INSTIs). Luciferase activity was measured at 48 h postinfection. Sensitivity of NC mutants to (C) NRTTI EFdA and (D) NNRTI RPV. Data from at least three independent experiments are shown as means  $\pm$  SEMs. \*,  $P < 0.05$  by one-way ANOVA and Tukey's multiple-comparison test or unpaired t-test.



Fig. S6

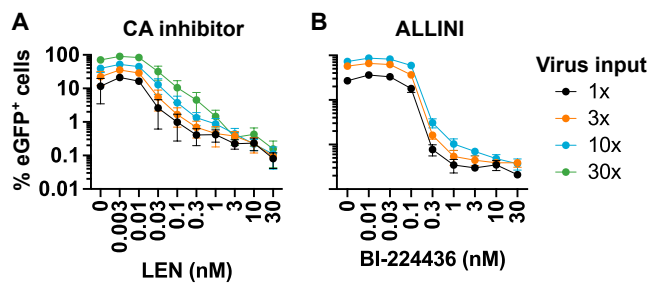

**Fig. S6. Sensitivity of VSV-G-pseudotyped eGFP reporter virus to a CA inhibitor and an ALLINI over a range of viral input.** A) CA inhibitor LEN, and B) ALLINI BI-224436. The SupT1 T-cell line was exposed to a 30-fold range of VSV-G pseudotyped eGFP reporter virus at the indicated inhibitor concentrations. The number of eGFP-positive cells was enumerated by flow cytometry.

Fig. S7

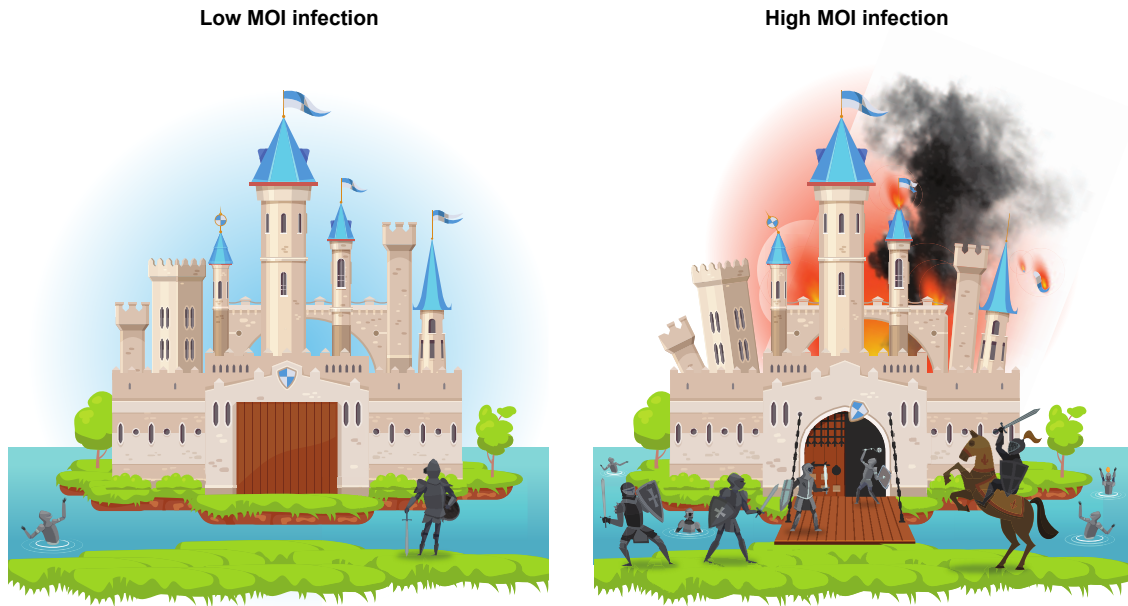

**Fig S7. Model for Env-mediated drug resistance by increasing the MOI via enhanced cell-cell transfer.** Left, low-MOI conditions; right, high-MOI conditions. In this cartoon, the soldiers represent viruses, the moat represents the ARV, and the castle represents the cell. Under low-MOI conditions, the ARVs completely block productive infection. Under high-MOI conditions, productive infection can still occur.
